# Supplementary material for: Immunological and Genetic Investigation of SARS-CoV-2 Reinfection in an Otherwise Healthy, Young Marine Recruit
Source: MDPI journal article supplement (doi:10.3390/pathogens10121589), 2021-12-08
Supplement: s1 [file s1]

**Table S1.** Acknowledgement table for sequences used in phylogenetic tree.

| Accession ID    | Originating laboratory                                                   | Submitting laboratory                                                                                                  | Authors                                                                                                                                                                                                                                                                                                                                                          |
|-----------------|--------------------------------------------------------------------------|------------------------------------------------------------------------------------------------------------------------|------------------------------------------------------------------------------------------------------------------------------------------------------------------------------------------------------------------------------------------------------------------------------------------------------------------------------------------------------------------|
| EPI_ISL_410045  | IL Department of Public Health Chicago Laboratory                        | Pathogen Discovery, Respiratory Viruses Branch, Division of Viral Diseases, Centers for Disease Control and Prevention | Authors<br>Anna Uehara; Brett L. Whitaker; Brian Lynch; Clinton R. Paden; Janna' R. Murray; Jing Zhang; Krista Queen; Lijuan Wang; Senthil Kumar K. Sakthivel; Shifaq Kamili; Stephen Lindstrom; Susan I. Gerber; Suxiang Tong; Xiaoyan Lu; Yan Li; Ying Tao                                                                                                     |
| EPI_ISL_596982  | Lighthouse Lab in Cambridge                                              | Wellcome Sanger institute for the COVID-19 Genomics UK (COG-UK) consortium                                             | Cordelia Langford; David K. Jackson; Dominic Kwiatkowski; Ewan Harrison; Ian Johnston; John Sillitoe on behalf of the Wellcome Sanger Institute COVID-19 Surveillance Team ( <a href="http://www.sanger.ac.uk/covid-team">http://www.sanger.ac.uk/covid-team</a> ); Rob Howes; Roberto Amato; Sonia Goncalves; The Lighthouse Lab in Cambridge and Alex Alderton |
| EPI_ISL_577572  | Michigan Department of Health and Human services, Bureau of Laboratories | Michigan Department of Health and Human Services, Bureau of Laboratories                                               | Blankenship HM; Riner D; Soehnlen MK                                                                                                                                                                                                                                                                                                                             |
| EPI_ISL_6638430 | Missouri State Public Health Laboratory Molecular Biology                | Missouri State Public Health Laboratory                                                                                | Ashley New; Joshua Barry; Matthew Sinn                                                                                                                                                                                                                                                                                                                           |
| EPI_ISL_6661896 | Laboratory, Westchester Medical Center                                   | Genomics Core Laboratory, New York Medical College                                                                     | Brahmaraju Mopidevi; Humayun K. Islam; Jian Zhuge; Salomon Amar; Utsav Pandey; Weihua Huang                                                                                                                                                                                                                                                                      |
| EPI_ISL_660629  | NHLS-IALCH                                                               | KRISP, KZN Research Innovation and Sequencing Platform                                                                 | Giandhari J; Khan S; Lessells R; Mdlalose K; Pillay S; Tegally H; Wilkinson E; York D; de Oliveira T                                                                                                                                                                                                                                                             |
| EPI_ISL_1624280 | Naval Infectious Diseases Diagnostic Laboratory                          | Naval Medical Research Center Biological Defense Research Directorate                                                  | Andrew Bennett; Bishwo Adhikari; Catherine Arnold; Francisco Malgon Bautista; Gregory Rice; Kimberly Bishop-Lilly; Kyle Long; Lindsay Glang; Logan Voegtly; Megan Schilling; Regina Cer; Victor Sugiharto                                                                                                                                                        |
| EPI_ISL_6782022 | State of New Hampshire Public Health Laboratories                        | State of New Hampshire Public Health Laboratories                                                                      | Caitlin Mercier; Chris Benton; Jinfeng Li; Juan Bolanos; Xinglu Zhang                                                                                                                                                                                                                                                                                            |
| EPI_ISL_695544  | TGen North                                                               | TGen North                                                                                                             | Ashlyn Pfeiffer; Chris French; Darrin Lemmer; Dave Engelthaler; Hayley Yaglom; Jolene Bowers; Megan Folkerts; The Arizona COVID Genomics Union (ACGU)                                                                                                                                                                                                            |
| EPI_ISL_572301  | Virginia DCLS                                                            | Virginia DCLS                                                                                                          | Virginia DCLS                                                                                                                                                                                                                                                                                                                                                    |
| EPI_ISL_402124  | Wuhan Jinyintan Hospital                                                 | Wuhan Institute of Virology, Chinese Academy of Sciences                                                               | Ding-Yu Zhang; Hao-Rui Si; Lei Zhang; Peng Zhou; Xing-Lou Yang; Yan Zhu; Zhengli Shi                                                                                                                                                                                                                                                                             |
