# Supplementary material for: Immunological and Genetic Investigation of SARS-CoV-2 Reinfection in an Otherwise Healthy, Young Marine Recruit
Source: MDPI journal article supplement (doi:10.3390/pathogens10121589), 2021-12-08
Supplement: s1 [file s1]

**Table S2. Summary of genome sequence data produced in this study and associated accession numbers.**

| <b>Sample name</b>             | <b>Pango lineage/Clade</b> | <b>GenBank Accession</b> | <b>GISAID Accession</b> | <b>SRA Accession</b> |
|--------------------------------|----------------------------|--------------------------|-------------------------|----------------------|
| SARS_CoV_2_CHARM_1167_d7_2020  | B.1.340/20C                | MW729373                 | EPI_ISL_6913902         | SRR17073938          |
| SARS_CoV_2_CHARM_1167_d14_2020 | No lineage assigned/20B    | OL678543                 | EPI_ISL_6913905         | SRR17073937          |
| SARS_CoV_2_CHARM_1167_d46_2020 | B.1.1/20B                  | MW729374                 | EPI_ISL_6913903         | SRR17073936          |
| SARS_CoV_2_CHARM_1167_d49_2020 | B.1.1/20B                  | MW729375                 | EPI_ISL_6913904         | SRR17073935          |
